# Supplementary material
Source: publisher figshare collection journal article supplement (https://gsajournals.figshare.com/ndownloader/files/18059201)
Supplement: Supplementary file 1 [file 18059201]

**Table S4. EVM weights**

| ABINITIO_PREDICTION | GeneMark | 1 |
| --- | --- | --- |
| ABINITIO_PREDICTION | Augustus | 1 |
| ABINITIO_PREDICTION | geneid_v1.4 | 1 |
| ABINITIO_PREDICTION | GlimmerHMM | 1 |
| ABINITIO_PREDICTION | geneid_introns | 3 |
| ABINITIO_PREDICTION | Augustus_introns | 3 |
| ABINITIO_PREDICTION | GeneMark-ET | 3 |
| OTHER_PREDICTION | transdecoder | 3 |
| TRANSCRIPT | PASA | 8 |
| PROTEIN | SPALN | 10 |
